# Supplementary material for: The Effects of Prenatal Dexamethasone Exposure on Brain Metabolic Homeostasis in Adulthood: Implications for Depression
Source: MDPI journal article supplement (doi:10.3390/ijms24021156), 2023-01-06

**Supplementary materials**

**Western blot membranes**

# OXPPOS

## Frontal cortex

membrane 1 and membrane 2

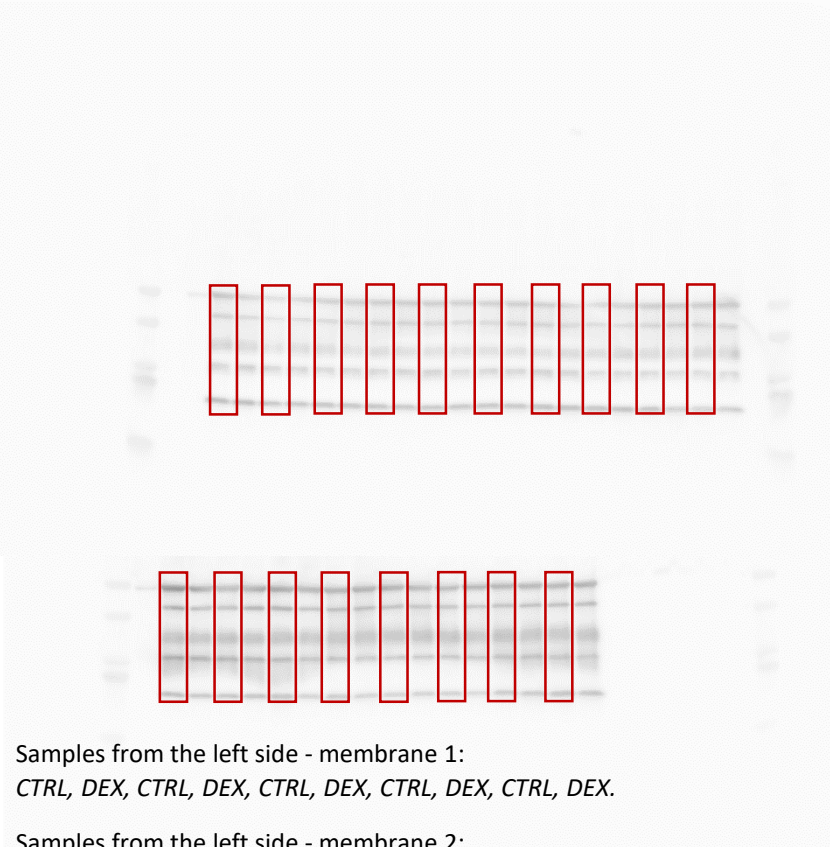

Samples from the left side - membrane 1:  
*CTRL, DEX, CTRL, DEX, CTRL, DEX, CTRL, DEX, CTRL, DEX.*

Samples from the left side - membrane 2:  
*CTRL, DEX, CTRL, DEX, CTRL, DEX, CTRL, DEX.*

The results of the experiment are shown in Figure 3.

# $\beta$ -actin as loading control to OXPPOS

## Frontal cortex

membrane 1 and membrane 2

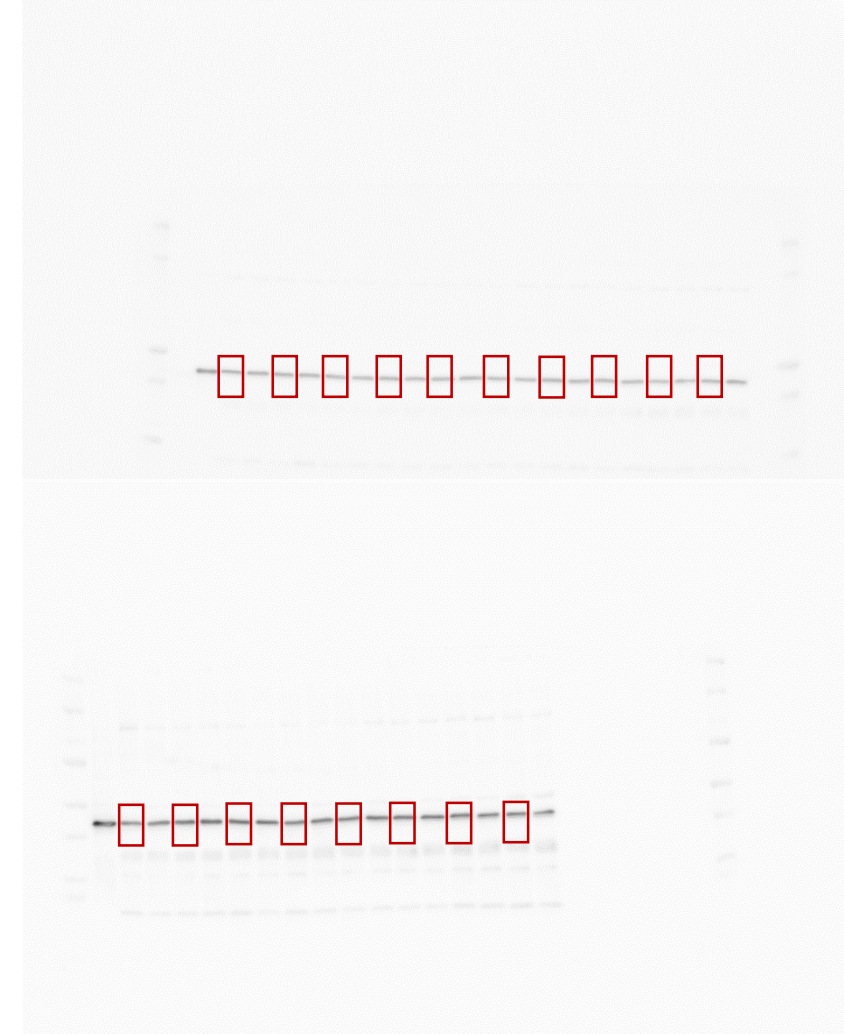

## OXPPOS

### Hippocampus

membrane 1 and membrane 2

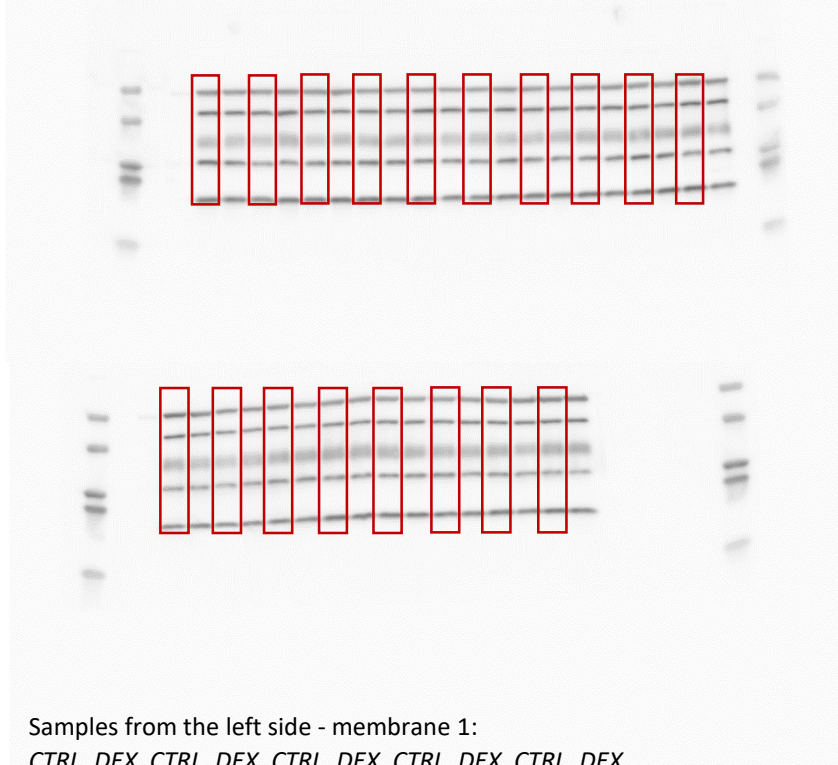

Samples from the left side - membrane 1:  
*CTRL, DEX, CTRL, DEX, CTRL, DEX, CTRL, DEX, CTRL, DEX.*

Samples from the left side - membrane 2:  
*CTRL, DEX, CTRL, DEX, CTRL, DEX, CTRL, DEX, CTRL, DEX.*

The results of the experiment are shown in Figure 3.

## $\beta$ -actin as loading control to OXPPOS

### Hippocampus

membrane 1 and membrane 2

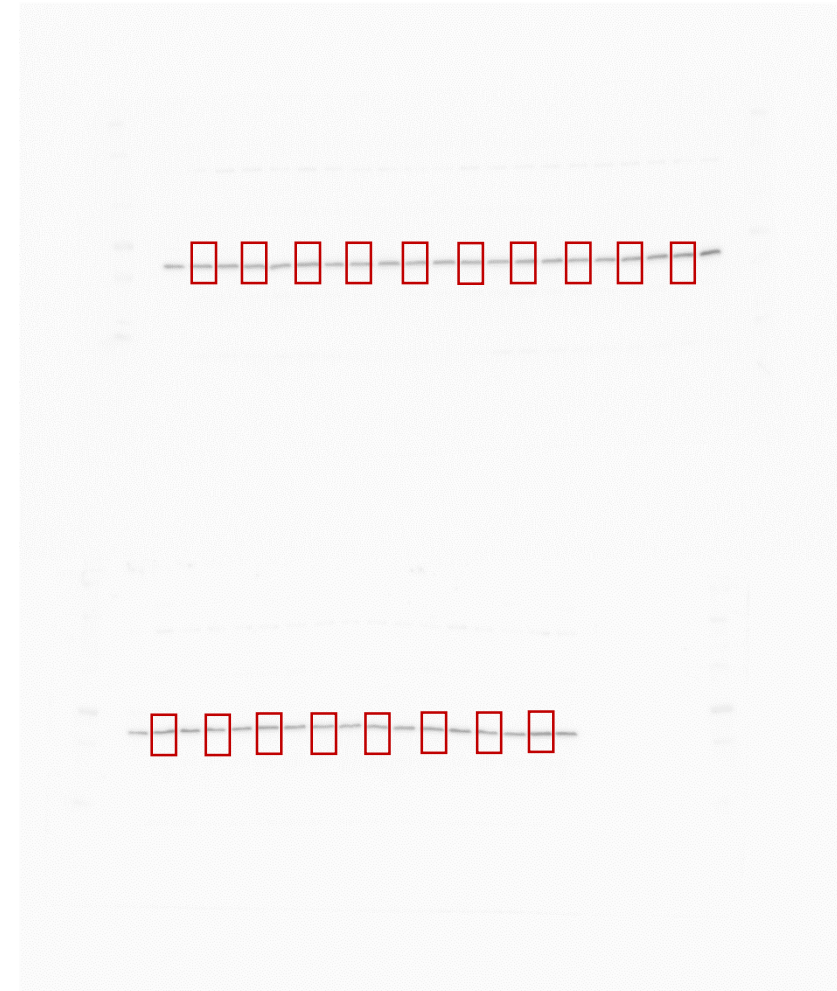

# Hexokinase 1

## Frontal cortex

membrane 1 and membrane 2

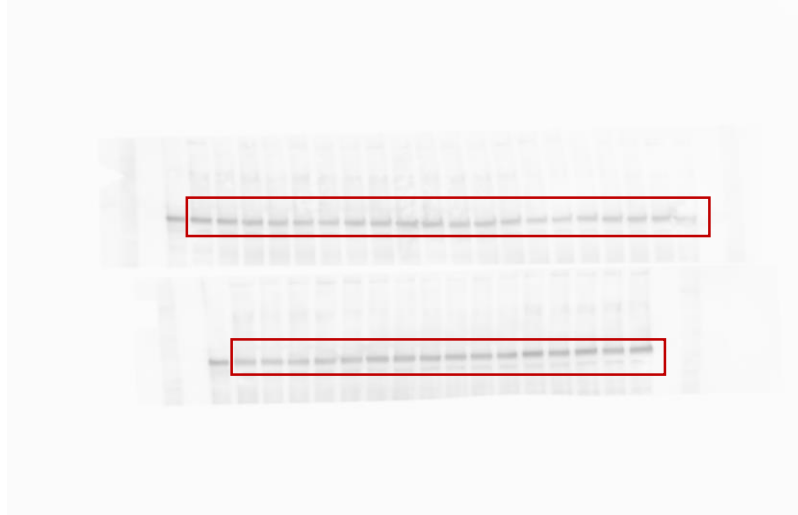

Samples from the left side - membrane 1:

*CTRL, CTRL + STRESS, DEX, DEX + STRESS, CTRL, CTRL + STRESS, DEX, DEX + STRESS, CTRL, CTRL + STRESS, DEX, DEX + STRESS, CTRL, CTRL + STRESS, DEX, DEX + STRESS.*

Samples from the left side - membrane 2:

*CTRL, CTRL + STRESS, DEX, DEX + STRESS, CTRL, CTRL + STRESS, DEX, DEX + STRESS, CTRL, CTRL + STRESS, DEX, DEX + STRESS, CTRL, CTRL + STRESS, DEX, DEX + STRESS.*

The results of the experiment are shown in Figure 7.

# $\beta$ -actin as loading control to Hexokinase 1

## Frontal cortex

membrane 1 and membrane 2

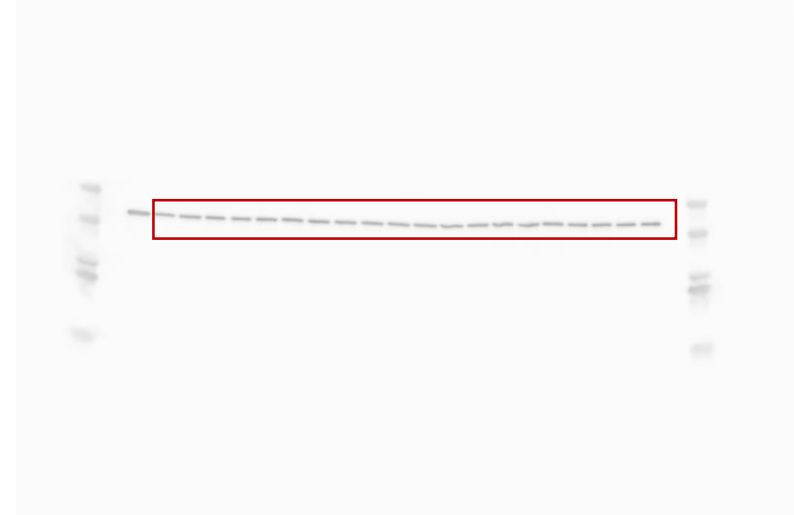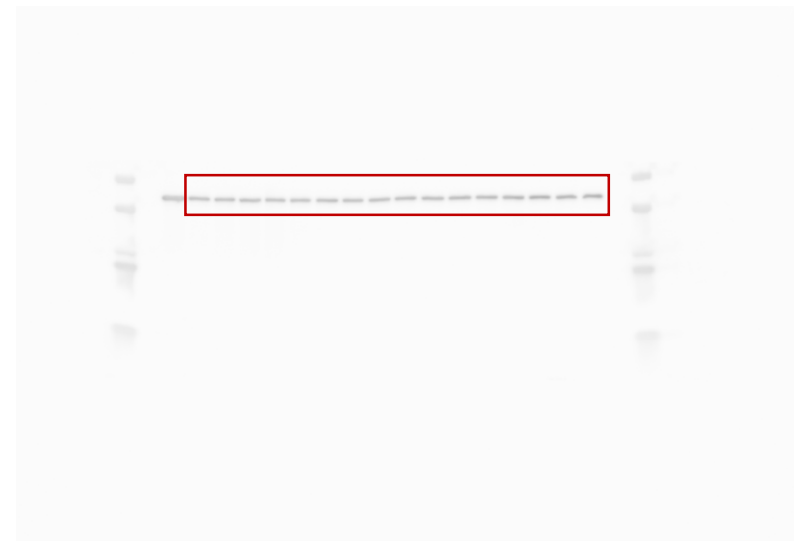

# Hexokinase 1

## Hippocampus

membrane 1 and membrane 2

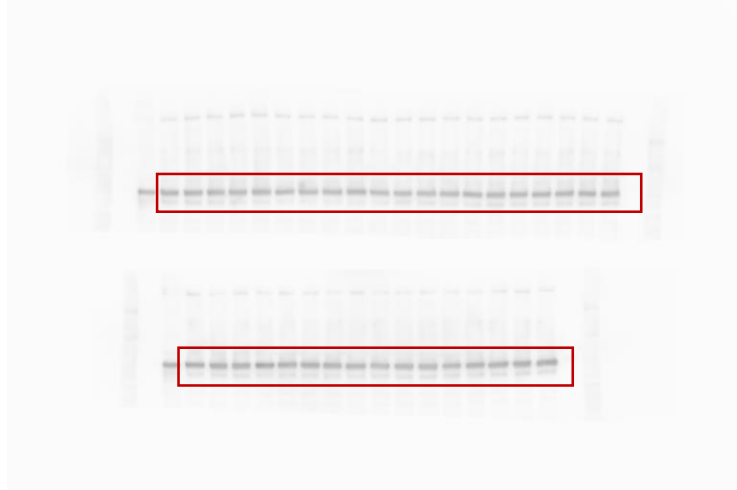

Samples from the left side - membrane 1:

*CTRL, CTRL + STRESS, DEX, DEX + STRESS, CTRL, CTRL + STRESS, DEX, DEX + STRESS, CTRL, CTRL + STRESS, DEX, DEX + STRESS, CTRL, CTRL + STRESS, DEX, DEX + STRESS.*

Samples from the left side - membrane 2:

*CTRL, CTRL + STRESS, DEX, DEX + STRESS, CTRL, CTRL + STRESS, DEX, DEX + STRESS, CTRL, CTRL + STRESS, DEX, DEX + STRESS, CTRL, CTRL + STRESS, DEX, DEX + STRESS.*

The results of the experiment are shown in Figure 7.

# $\beta$ -actin as loading control to Hexokinase 1

## Hippocampus

membrane 1 and membrane 2

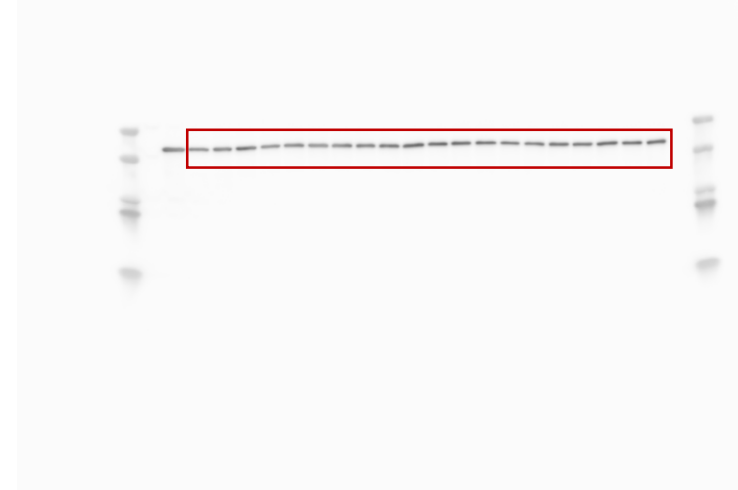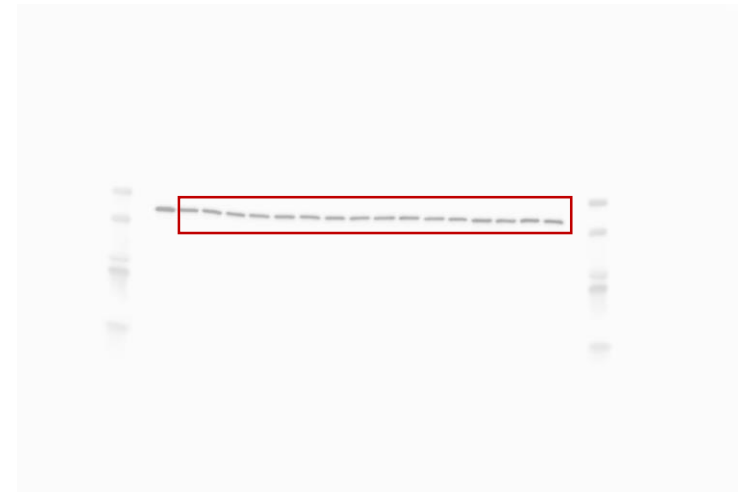

## MCT-2

### Frontal cortex

membrane 1 and membrane 2

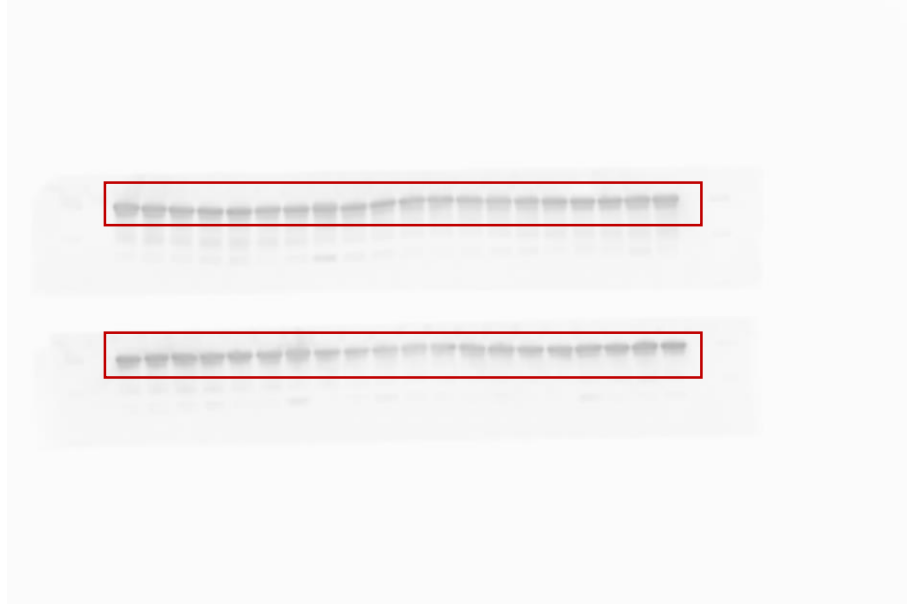

Samples from the left side - membrane 1 and 2:

*CTRL, CTRL + STRESS, DEX, DEX + STRESS, CTRL, CTRL + STRESS, DEX, DEX + STRESS, CTRL, CTRL + STRESS, DEX, DEX + STRESS, CTRL, CTRL + STRESS, DEX, DEX + STRESS.*

The results of the experiment are shown in Figure 8.

## Vinculin as loading control to MCT-2

### Frontal cortex

membrane 1 and membrane 2

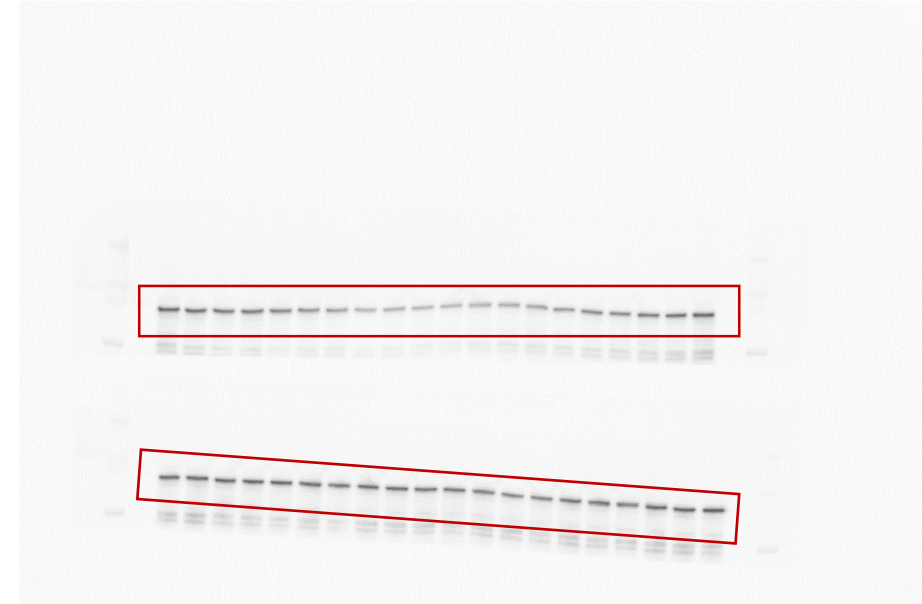

## MCT-2

### Hippocampus

membrane 1 and membrane 2

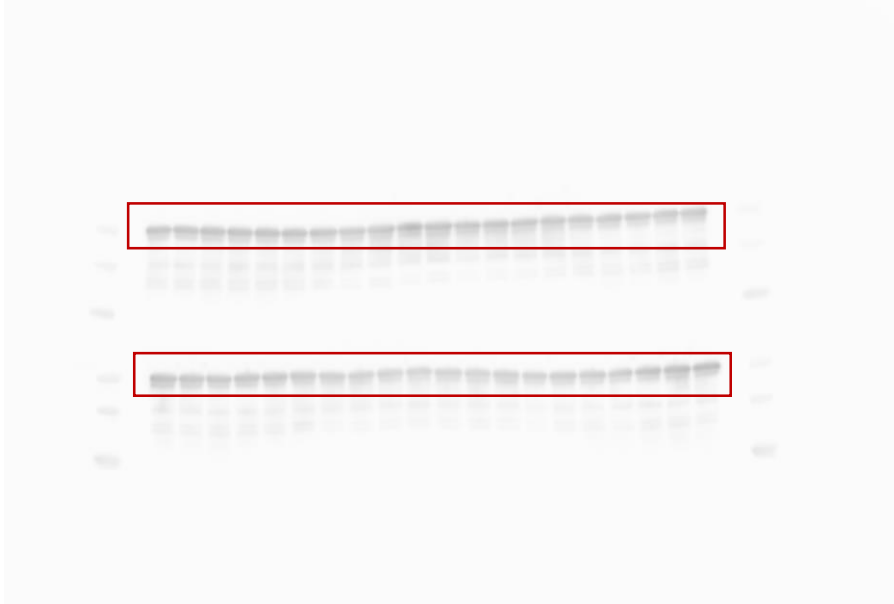

Samples from the left side - membrane 1 and 2:

*CTRL, CTRL + STRESS, DEX, DEX + STRESS, CTRL, CTRL + STRESS, DEX, DEX + STRESS.*

The results of the experiment are shown in Figure 8.

## Vinculin as loading control to MCT-2

### Hippocampus

membrane 1 and membrane 2

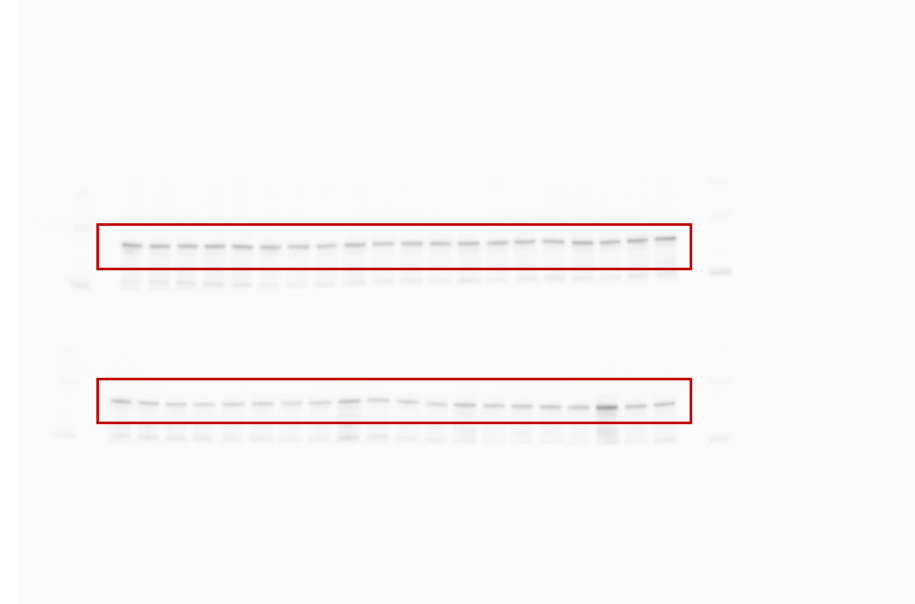



## MCT-4

### Frontal cortex

membrane 1 and membrane 2

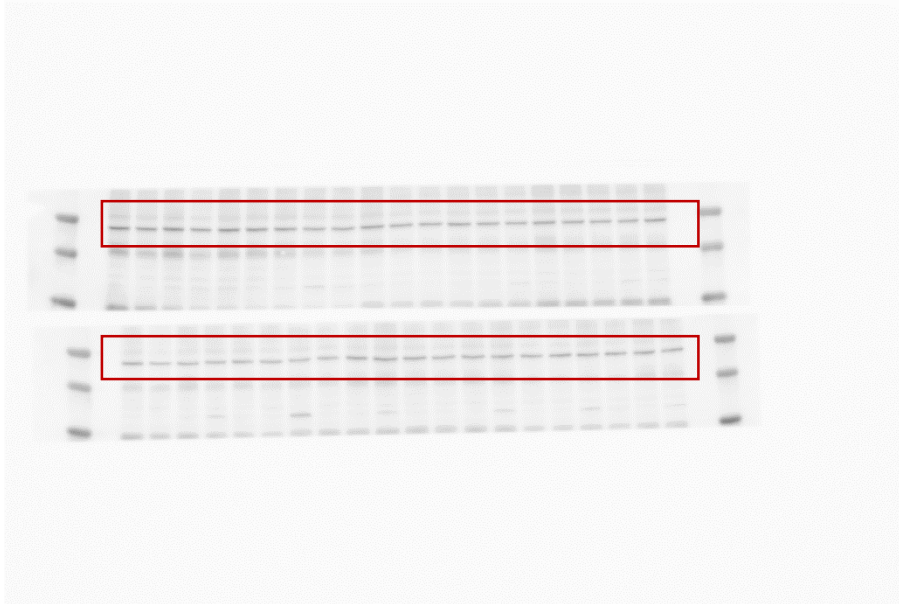

Samples from the left side - membrane 1 and 2:

*CTRL, CTRL + STRESS, DEX, DEX + STRESS, CTRL, CTRL + STRESS, DEX, DEX + STRESS, CTRL, CTRL + STRESS, DEX, DEX + STRESS, CTRL, CTRL + STRESS, DEX, DEX + STRESS.*

.

The results of the experiment are shown in Figure 8.

## Vinculin as loading control to MCT-4

### Frontal cortex

membrane 1 and membrane 2

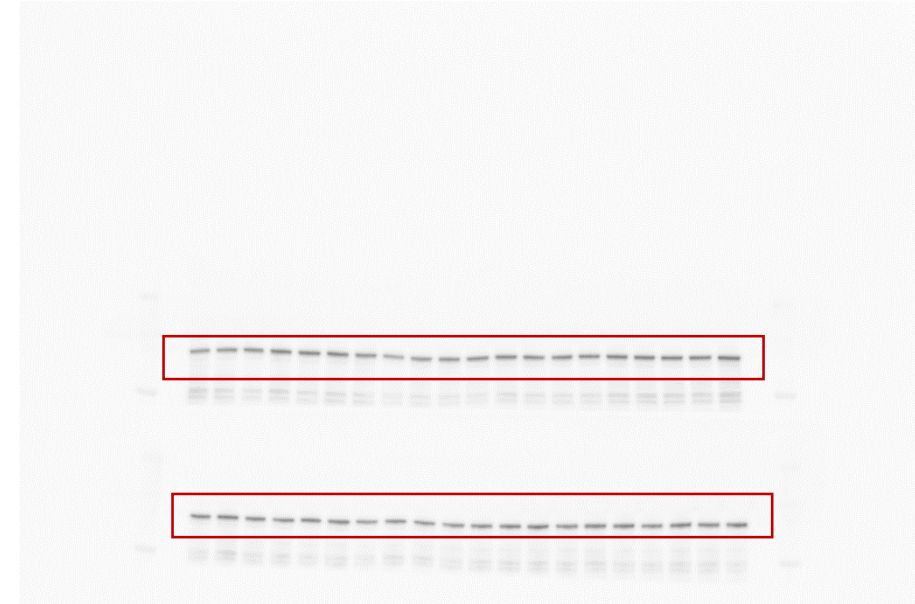



## MCT-4

### Hippocampus

membrane 1 and membrane 2

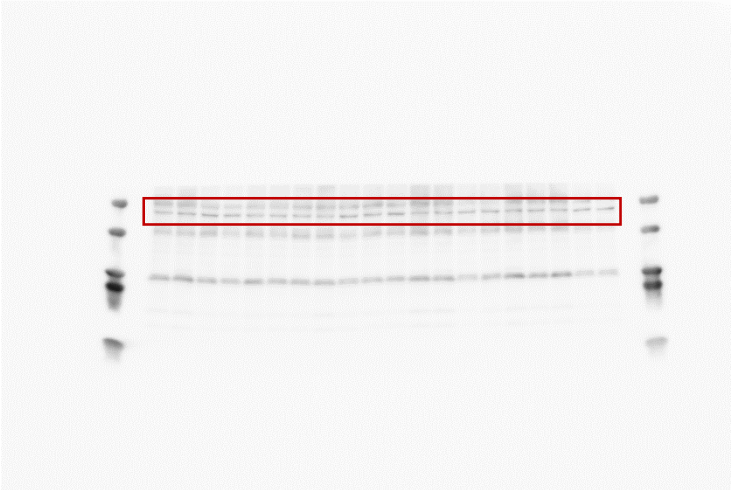

## Vinculin as loading control to MCT-4

### Hippocampus

membrane 1 and membrane 2

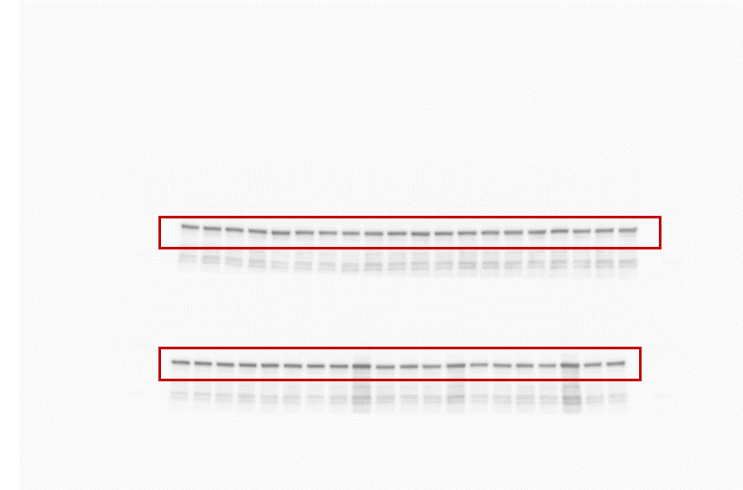

Samples from the left side - membrane 1 and 2:

*CTRL, CTRL + STRESS, DEX, DEX + STRESS, CTRL, CTRL + STRESS, DEX, DEX + STRESS.*

The results of the experiment are shown in Figure 8.

## MPC-1

### Frontal cortex

membrane 1 and membrane 2

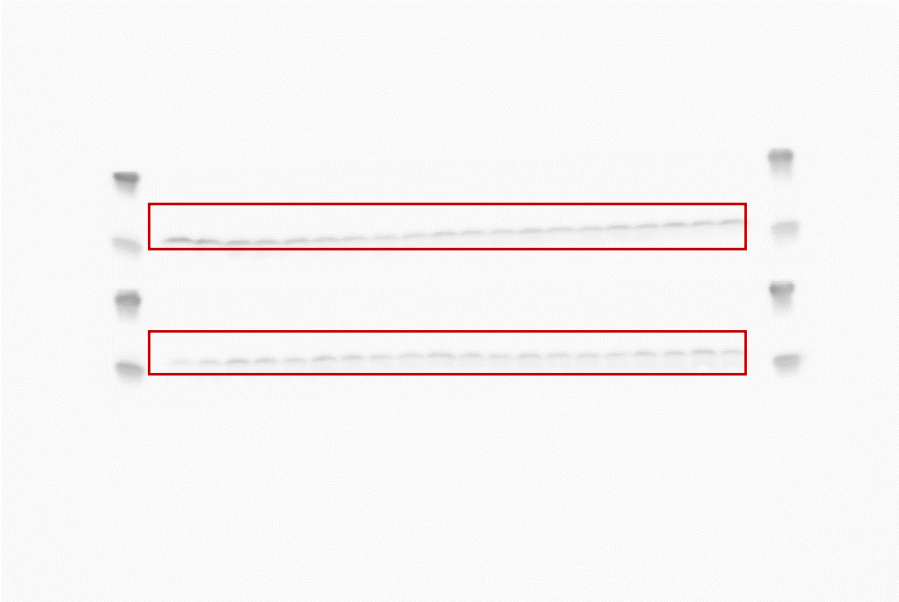

Samples from the left side - membrane 1 and 2:

*CTRL, CTRL + STRESS, DEX, DEX + STRESS, CTRL, CTRL + STRESS, DEX, DEX + STRESS.*

The results of the experiment are shown in Figure 8.

## Vinculin as loading control to MPC-1

### Frontal cortex

membrane 1 and membrane 2

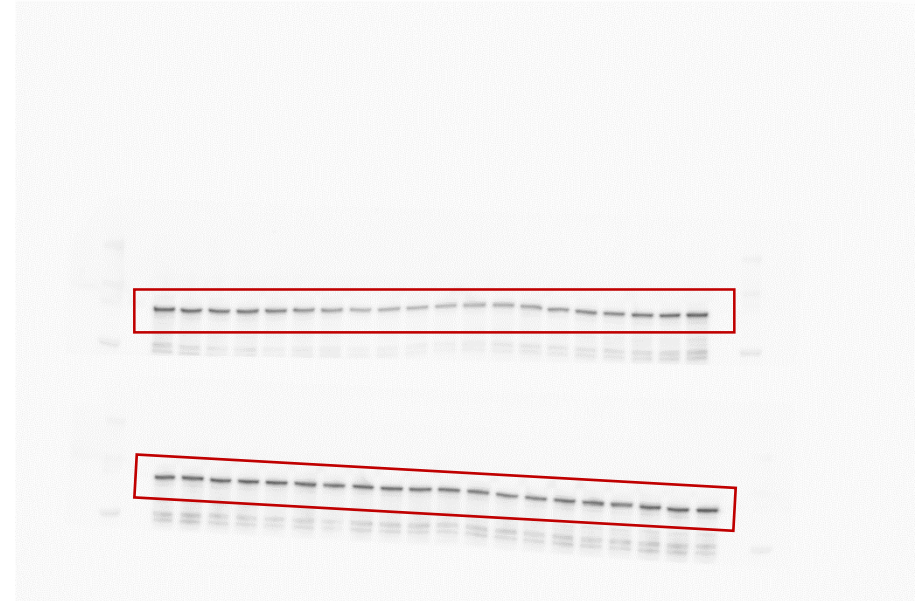

## MPC-1

### Hippocampus

membrane 1 and membrane 2

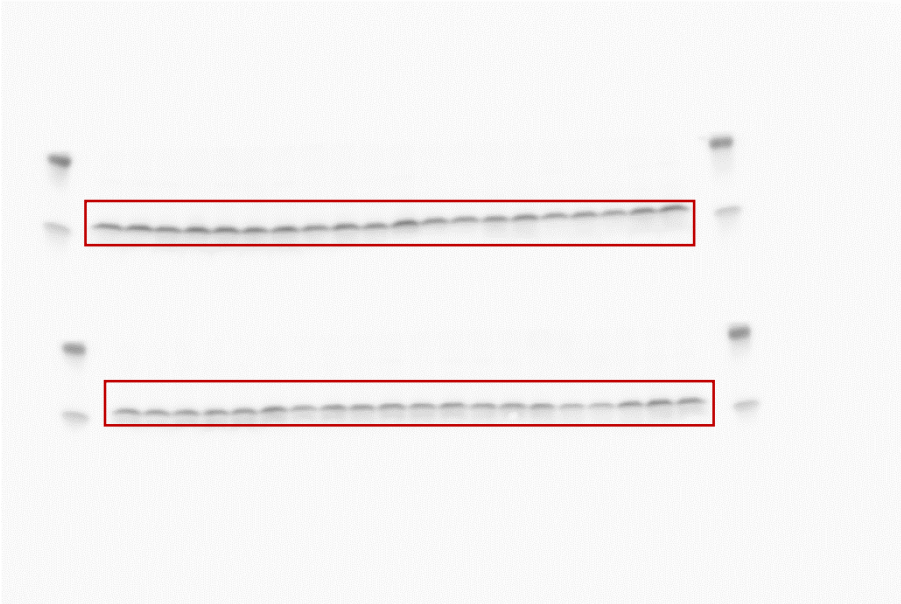

Samples from the left side - membrane 1 and 2:

*CTRL, CTRL + STRESS, DEX, DEX + STRESS, CTRL, CTRL + STRESS, DEX, DEX + STRESS,  
CTRL, CTRL + STRESS, DEX, DEX + STRESS, CTRL, CTRL + STRESS, DEX, DEX + STRESS,  
CTRL, CTRL + STRESS, DEX, DEX + STRESS.*

The results of the experiment are shown in Figure 8.

## Vinculin as loading control to MPC-1

### Hippocampus

membrane 1 and membrane 2

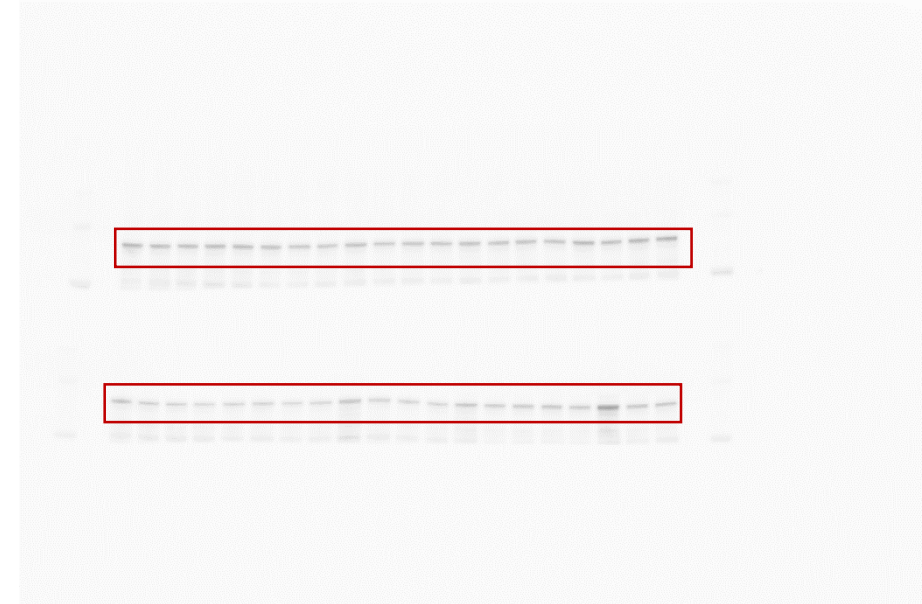

## MPC-2

### Frontal cortex

membrane 1 and membrane 2

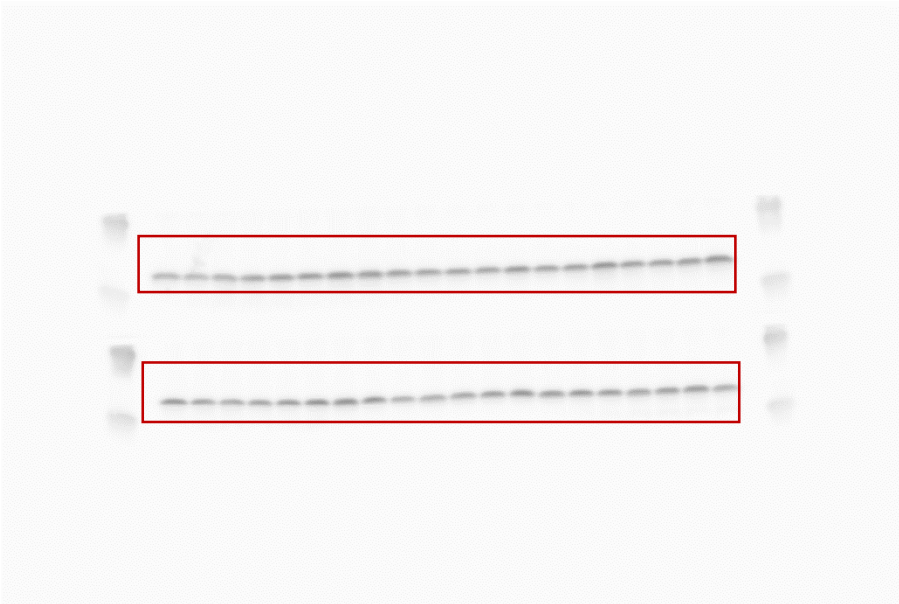

Samples from the left side - membrane 1 and 2:

*CTRL, CTRL + STRESS, DEX, DEX + STRESS, CTRL, CTRL + STRESS, DEX, DEX + STRESS.*

The results of the experiment are shown in Figure 8.

## Vinculin as loading control to MPC-2

### Frontal cortex

membrane 1 and membrane 2

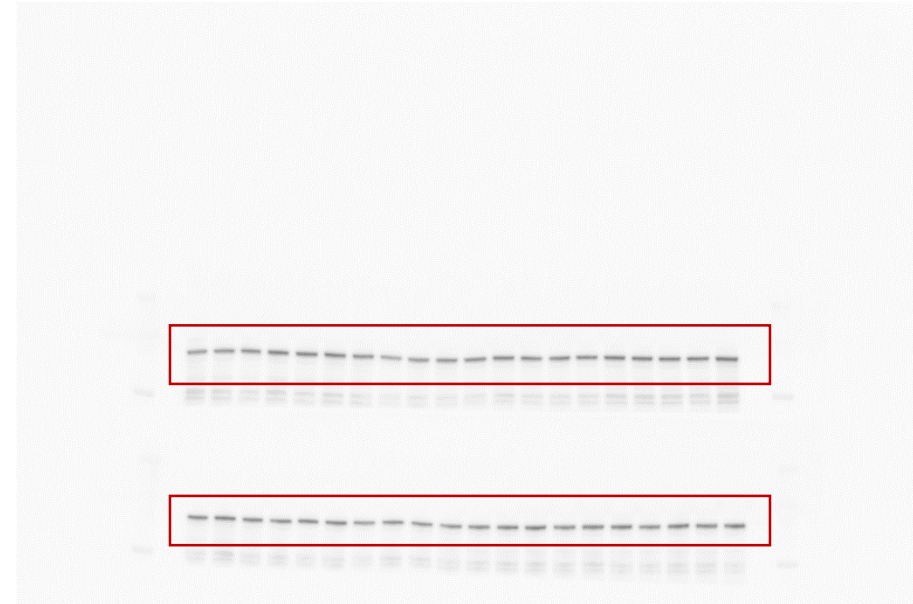

## MPC-2

### Hippocampus

membrane 1 and membrane 2

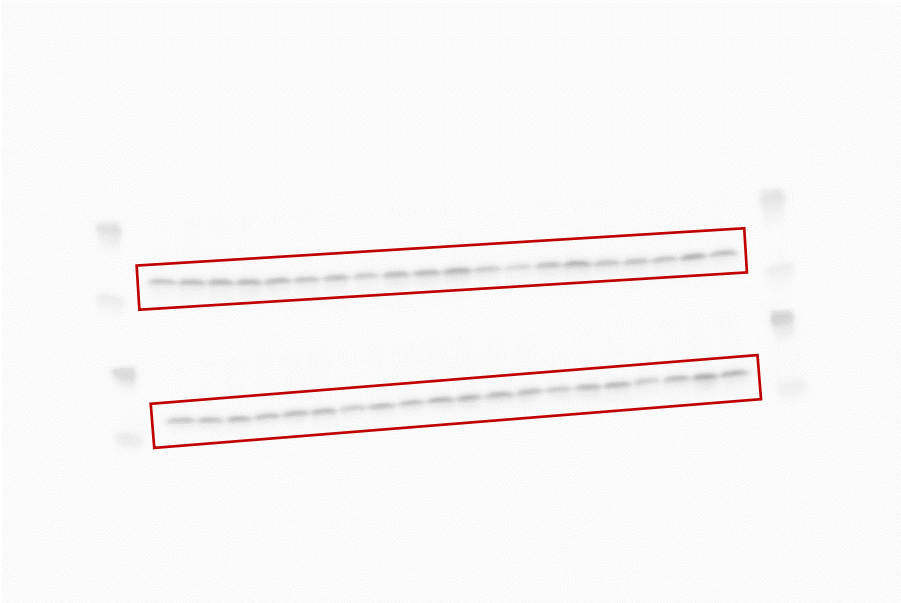

Samples from the left side - membrane 1 and 2:

*CTRL, CTRL + STRESS, DEX, DEX + STRESS, CTRL, CTRL + STRESS, DEX, DEX + STRESS,  
CTRL, CTRL + STRESS, DEX, DEX + STRESS, CTRL, CTRL + STRESS, DEX, DEX + STRESS,  
CTRL, CTRL + STRESS, DEX, DEX + STRESS.*

The results of the experiment are shown in Figure 8.

## Vinculin as loading control to MPC-2

### Hippocampus

membrane 1 and membrane 2

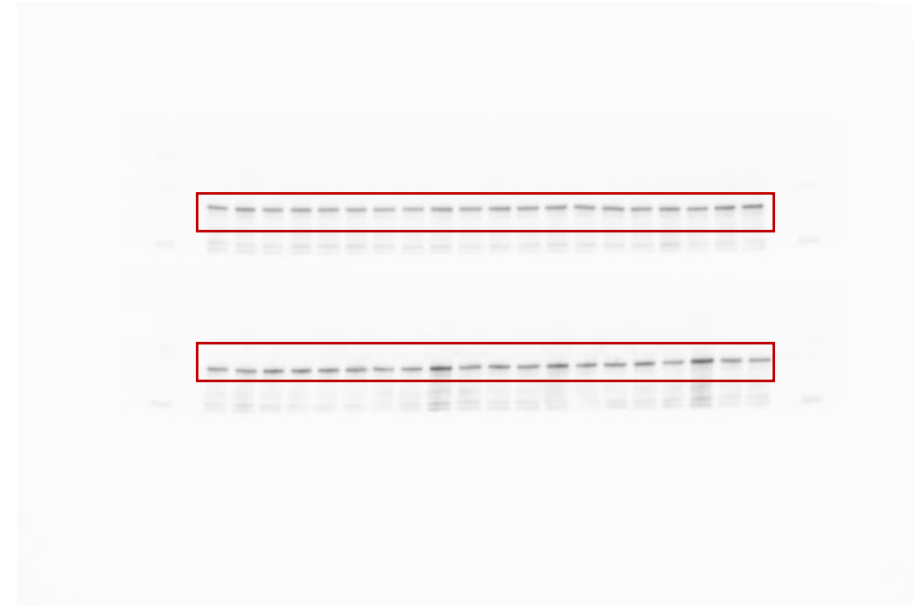



## GPR81

### Frontal cortex

membrane 1 and membrane 2

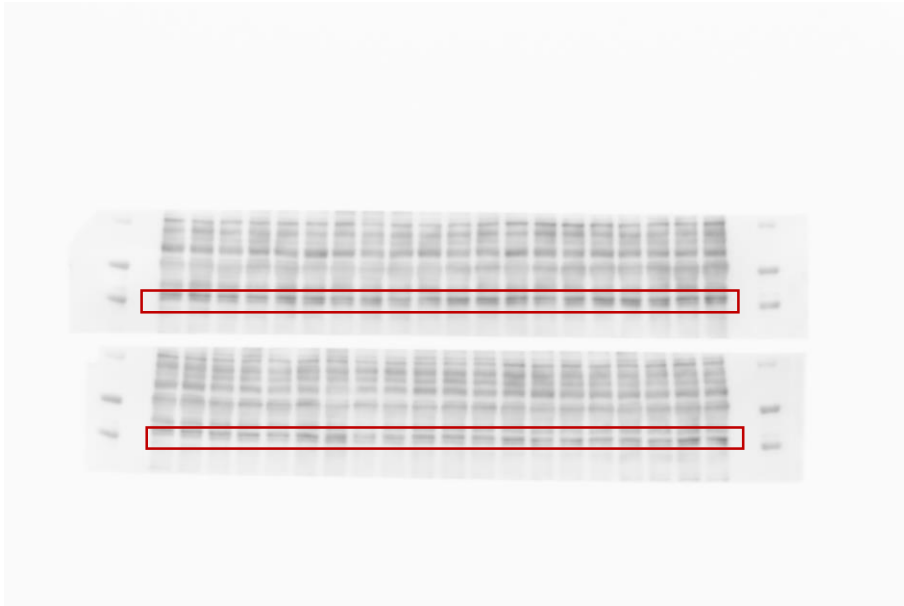

Samples from the left side - membrane 1 and 2:

*CTRL, CTRL + STRESS, DEX, DEX + STRESS, CTRL, CTRL + STRESS, DEX, DEX + STRESS.*

The results of the experiment are shown in Figure 9.

## Vinculin as loading control to GPR81

### Frontal cortex

membrane 1 and membrane 2

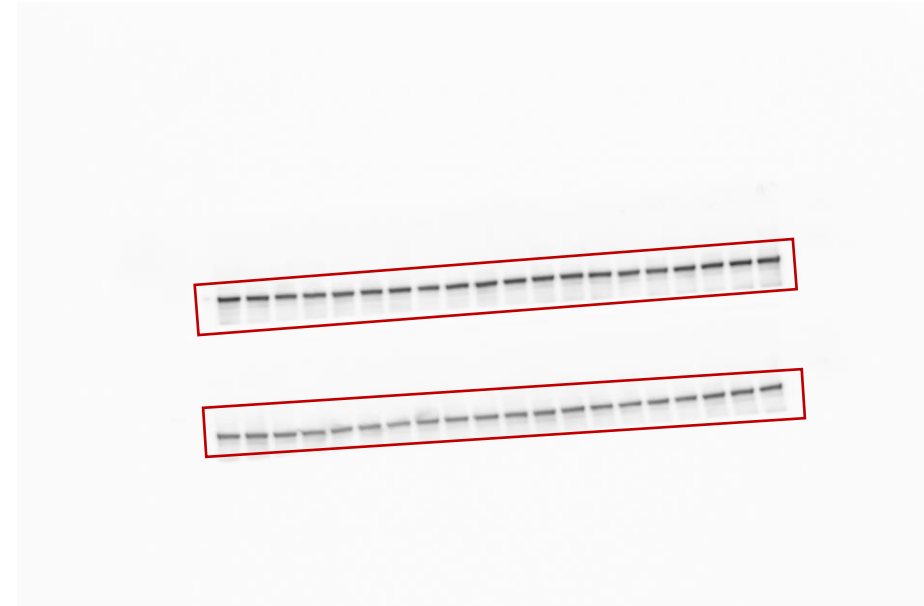

## GPR81

### Hippocampus

membrane 1 and membrane 2

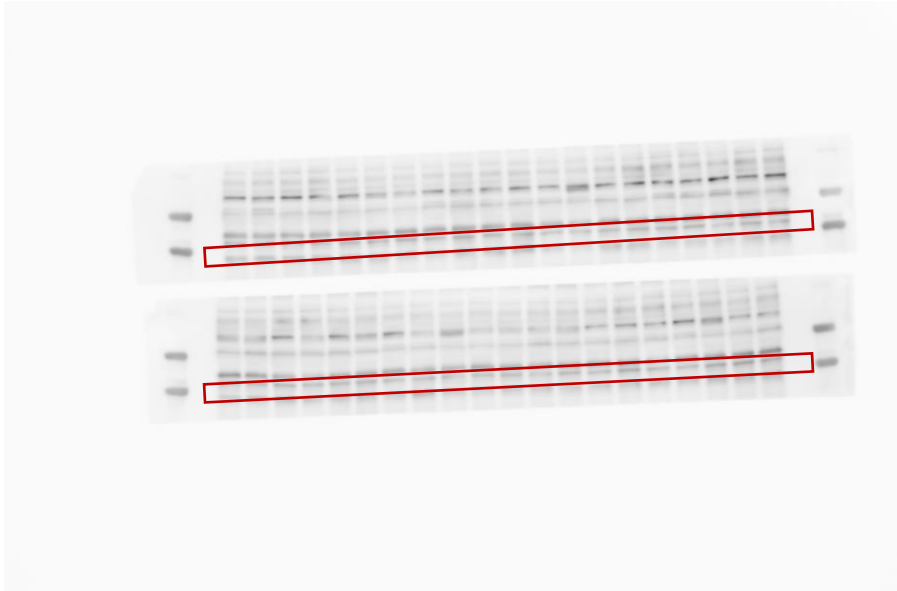

Samples from the left side - membrane 1 and 2:

*CTRL, CTRL + STRESS, DEX, DEX + STRESS, CTRL, CTRL + STRESS, DEX, DEX + STRESS,  
CTRL, CTRL + STRESS, DEX, DEX + STRESS, CTRL, CTRL + STRESS, DEX, DEX + STRESS,  
CTRL, CTRL + STRESS, DEX, DEX + STRESS.*

The results of the experiment are shown in Figure 9.

## Vinculin as loading control to GPR81

### Hippocampus

membrane 1 and membrane 2

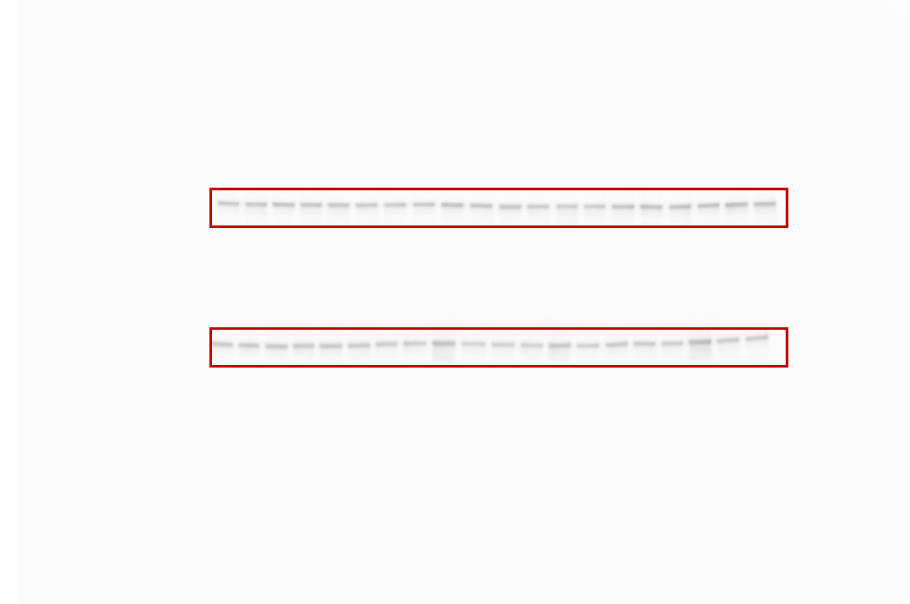



## pAkt

### Frontal cortex

membrane 1 and membrane 2

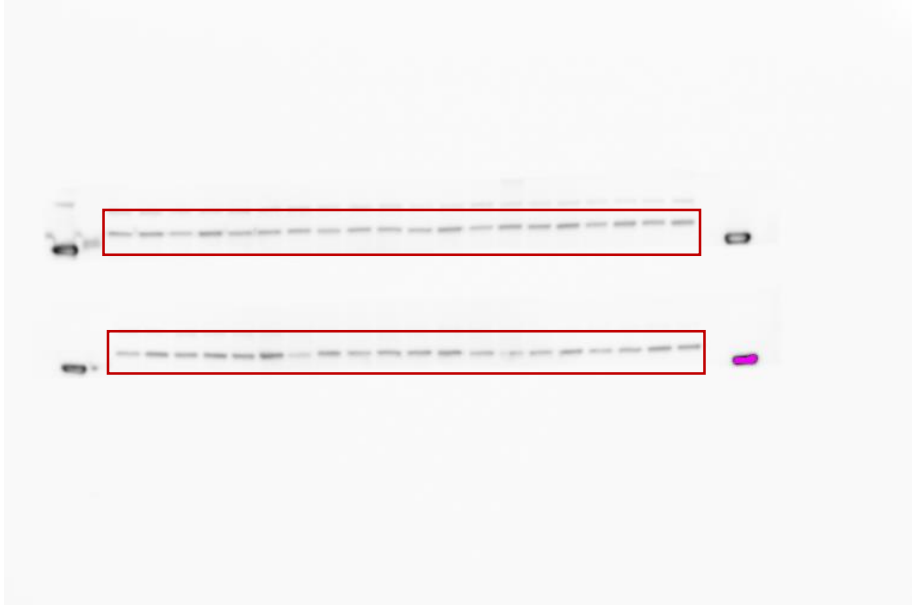

Samples from the left side - membrane 1 and 2:

*CTRL, CTRL + STRESS, DEX, DEX + STRESS, CTRL, CTRL + STRESS, DEX, DEX + STRESS.*

The results of the experiment are shown in Figure 9.

## Akt

### Frontal cortex

membrane 1 and membrane 2

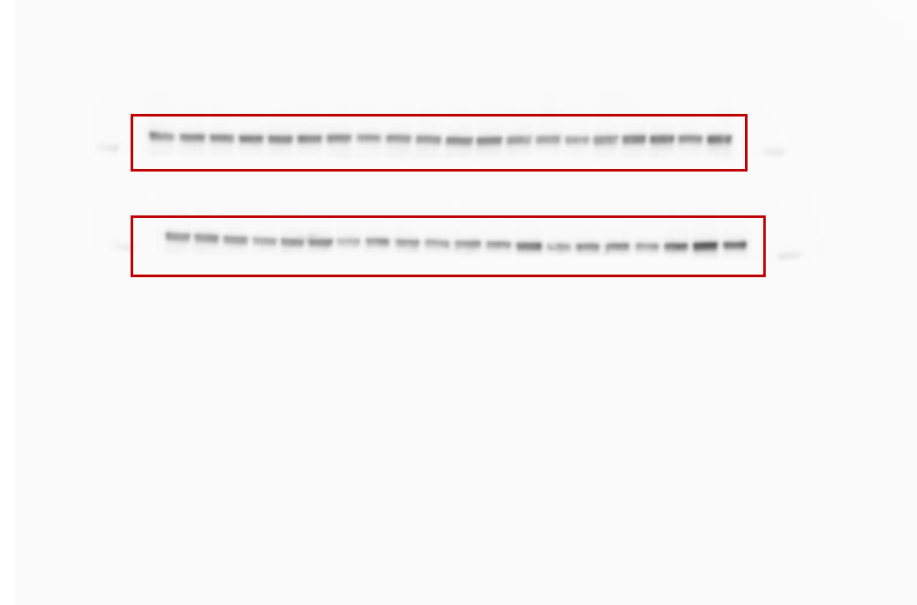

**pAkt**

**Hippocampus**

membrane 3 and membrane 4

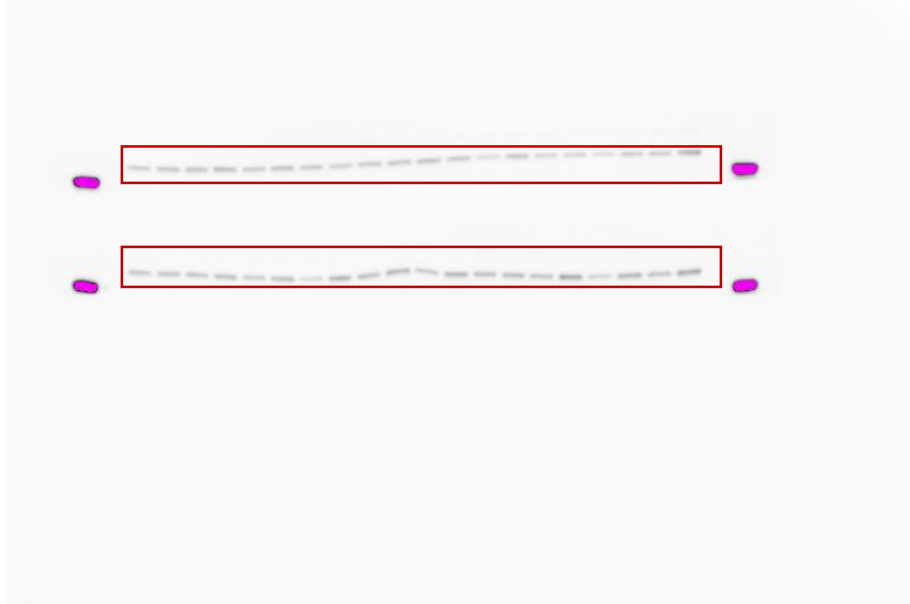

Samples from the left side - membrane 1 and 2:

*CTRL, CTRL + STRESS, DEX, DEX + STRESS, CTRL, CTRL + STRESS, DEX, DEX + STRESS,  
CTRL, CTRL + STRESS, DEX, DEX + STRESS, CTRL, CTRL + STRESS, DEX, DEX + STRESS,  
CTRL, CTRL + STRESS, DEX, DEX + STRESS.*

The results of the experiment are shown in Figure 11.

**Akt**

**Hippocampus**

membrane 3 and membrane 4

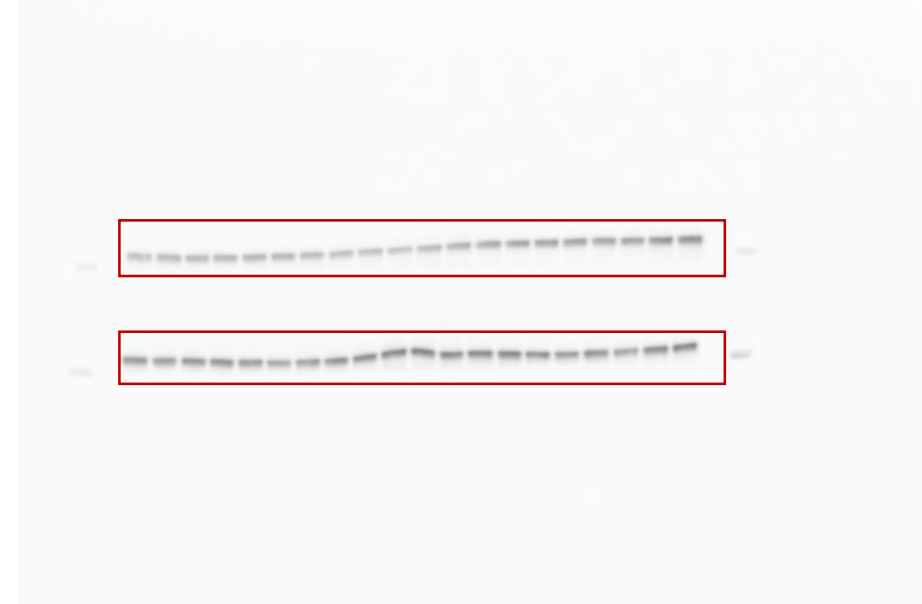

# $\beta$ -actin as loading control to Akt and pAkt

## Frontal cortex

## Hippocampus

membrane 1 and membrane 2

membrane 3 and membrane 4

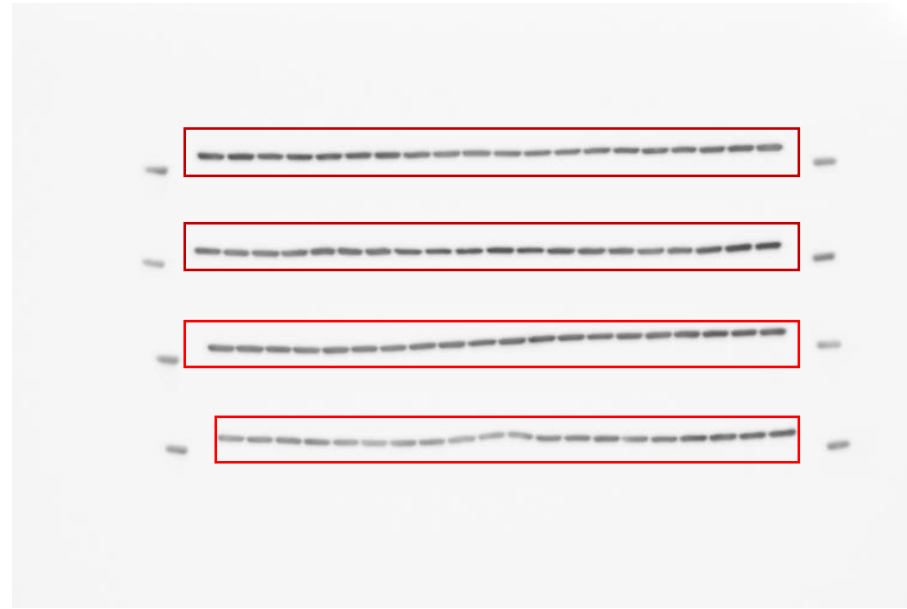

Samples from the left side - membrane 1-4:

*CTRL, CTRL + STRESS, DEX, DEX + STRESS, CTRL, CTRL + STRESS, DEX, DEX + STRESS,*  
*CTRL, CTRL + STRESS, DEX, DEX + STRESS, CTRL, CTRL + STRESS, DEX, DEX + STRESS,*  
*CTRL, CTRL + STRESS, DEX, DEX + STRESS.*

The results of the experiment are shown in Figure 11.

UCP-4

Frontal cortex

membrane 1 and membrane 2

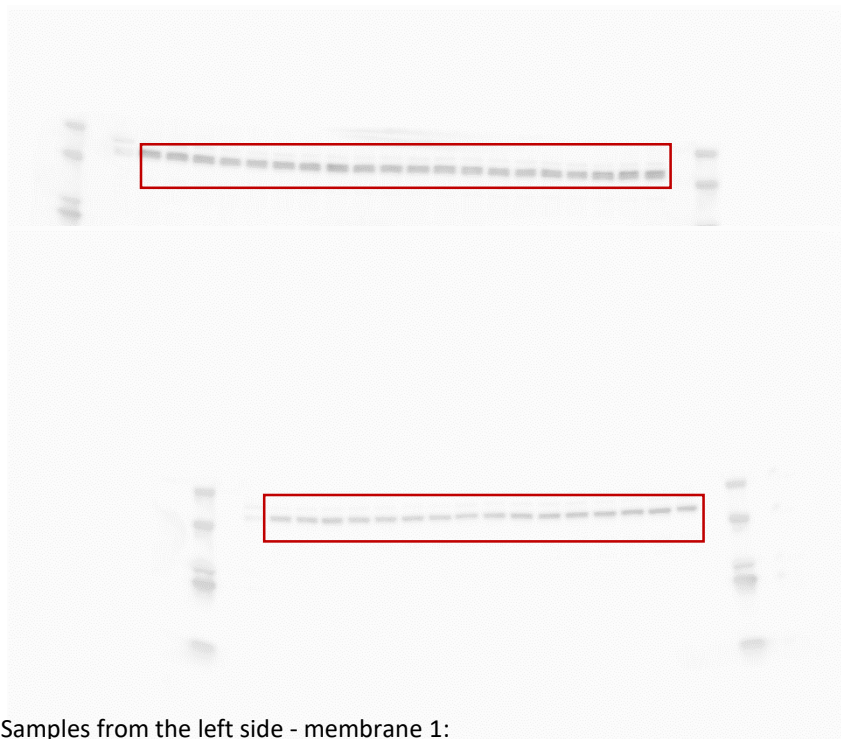

Samples from the left side - membrane 1:  
*CTRL, CTRL + STRESS, DEX, DEX + STRESS, CTRL, CTRL + STRESS, DEX, DEX + STRESS, CTRL, CTRL + STRESS, DEX, DEX + STRESS, CTRL, CTRL + STRESS, DEX, DEX + STRESS.*

Samples from the left side - membrane 2:  
*CTRL, CTRL + STRESS, DEX, DEX + STRESS, CTRL, CTRL + STRESS, DEX, DEX + STRESS, CTRL, CTRL + STRESS, DEX, DEX + STRESS, CTRL, CTRL + STRESS, DEX, DEX + STRESS.*

The results of the experiment are shown in Table 1.

$\beta$ -actin as loading control to UCP-4

Frontal cortex

membrane 1 and membrane 2

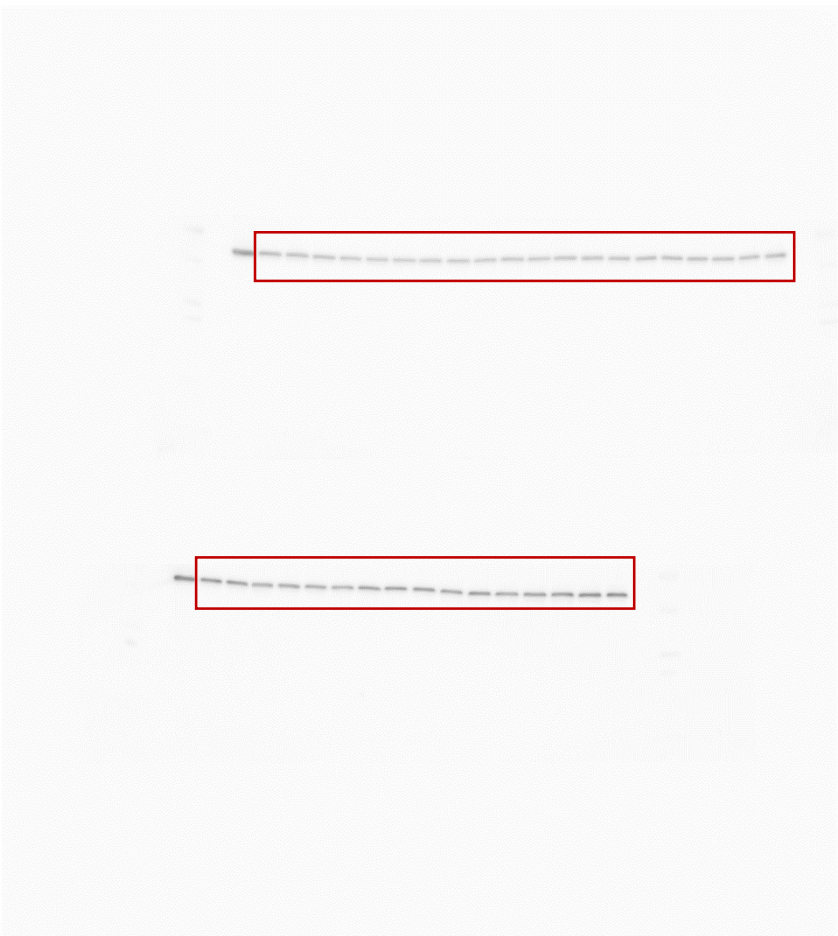

UCP-4

Hippocampus

membrane 1 and membrane 2

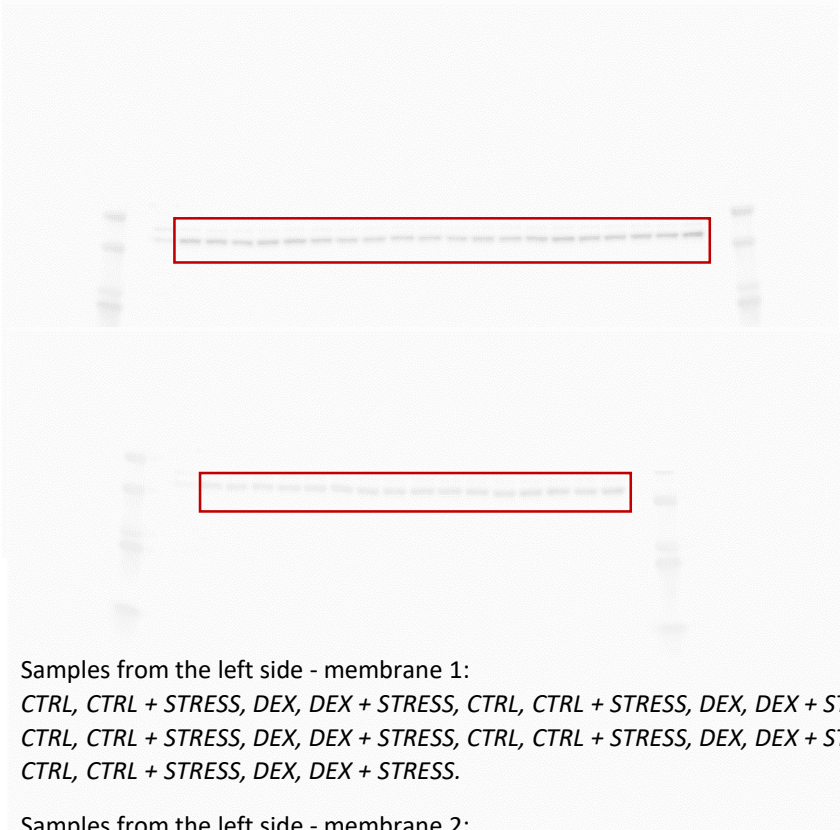

Samples from the left side - membrane 1:  
*CTRL, CTRL + STRESS, DEX, DEX + STRESS, CTRL, CTRL + STRESS, DEX, DEX + STRESS,*  
*CTRL, CTRL + STRESS, DEX, DEX + STRESS, CTRL, CTRL + STRESS, DEX, DEX + STRESS,*  
*CTRL, CTRL + STRESS, DEX, DEX + STRESS.*

Samples from the left side - membrane 2:  
*CTRL, CTRL + STRESS, DEX, DEX + STRESS, CTRL, CTRL + STRESS, DEX, DEX + STRESS,*  
*CTRL, CTRL + STRESS, DEX, DEX + STRESS, CTRL, CTRL + STRESS, DEX, DEX + STRESS.*

The results of the experiment are shown in Table 1.

β-actin as loading control to UCP-4

Hippocampus

membrane 1 and membrane 2

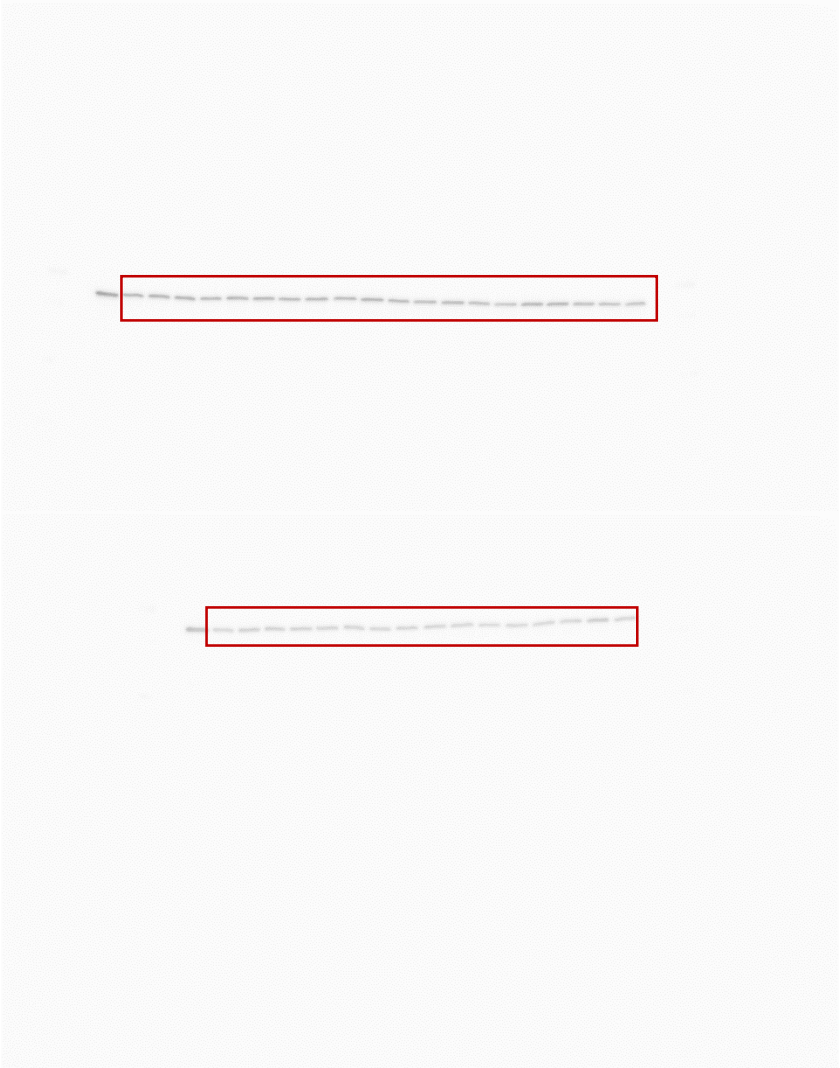

## MFN2

### Frontal cortex

membrane 1 and membrane 2

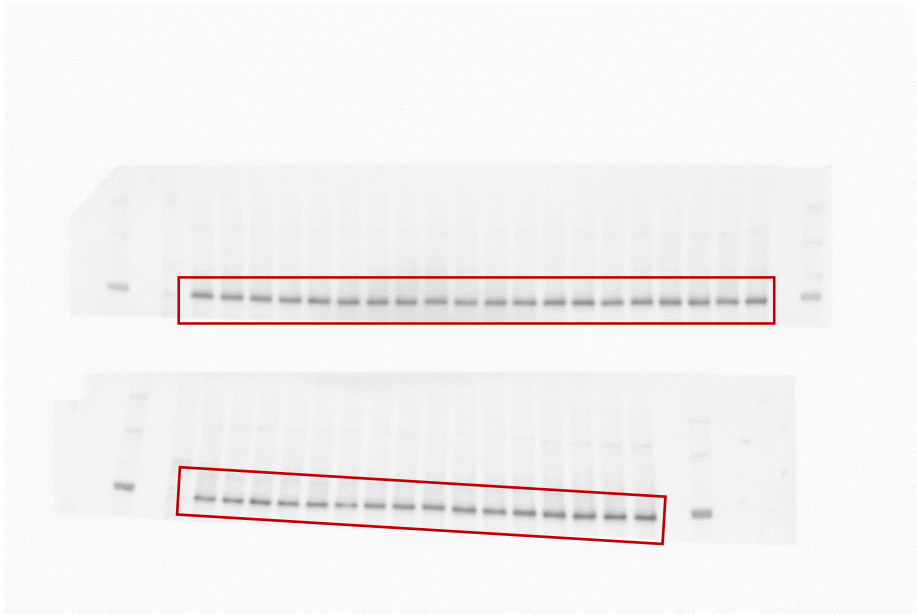

Samples from the left side - membrane 1:

*CTRL, CTRL + STRESS, DEX, DEX + STRESS, CTRL, CTRL + STRESS, DEX, DEX + STRESS, CTRL, CTRL + STRESS, DEX, DEX + STRESS, CTRL, CTRL + STRESS, DEX, DEX + STRESS.*

Samples from the left side - membrane 2:

*CTRL, CTRL + STRESS, DEX, DEX + STRESS, CTRL, CTRL + STRESS, DEX, DEX + STRESS, CTRL, CTRL + STRESS, DEX, DEX + STRESS, CTRL, CTRL + STRESS, DEX, DEX + STRESS.*

The results of the experiment are shown in Table 1.

## $\beta$ -actin as loading control to MFN2

### Frontal cortex

membrane 1 and membrane 2

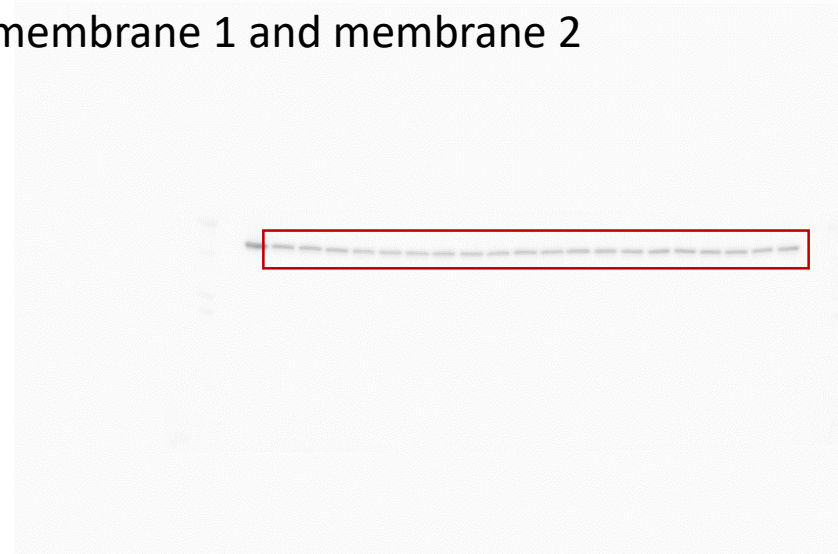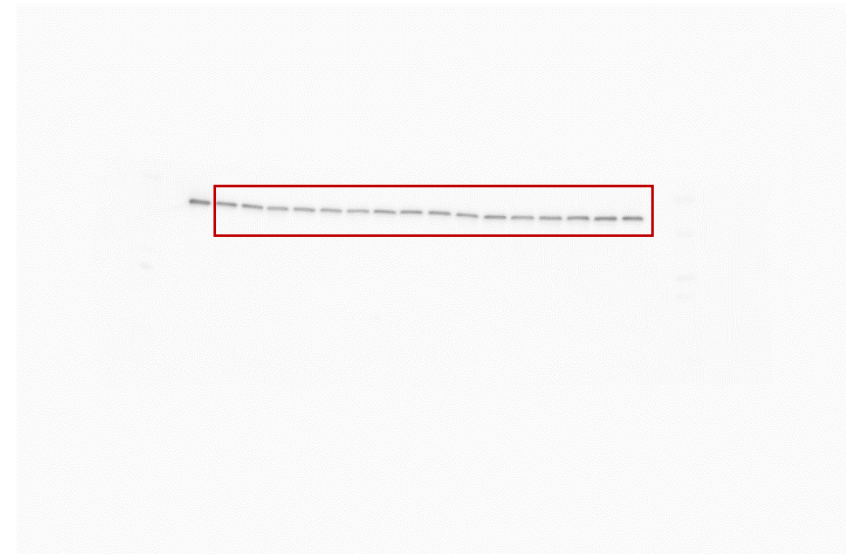



## MFN2

### Hippocampus

membrane 1 and membrane 2

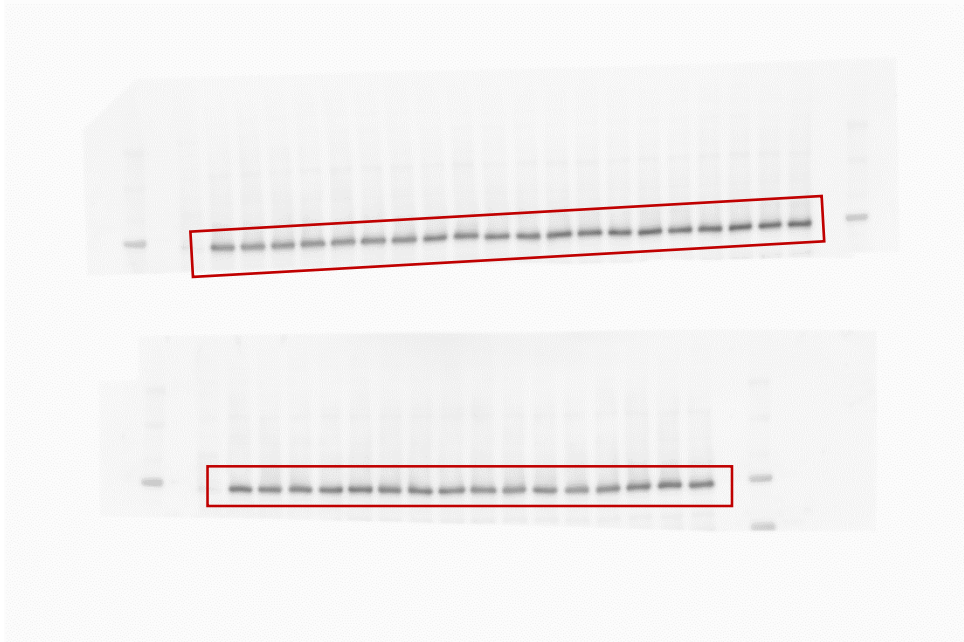

Samples from the left side - membrane 1:

*CTRL, CTRL + STRESS, DEX, DEX + STRESS, CTRL, CTRL + STRESS, DEX, DEX + STRESS.*

Samples from the left side - membrane 2:

*CTRL, CTRL + STRESS, DEX, DEX + STRESS, CTRL, CTRL + STRESS, DEX, DEX + STRESS.*

The results of the experiment are shown in Table 1.

## $\beta$ -actin as loading control to MFN2

### Hippocampus

membrane 1 and membrane 2

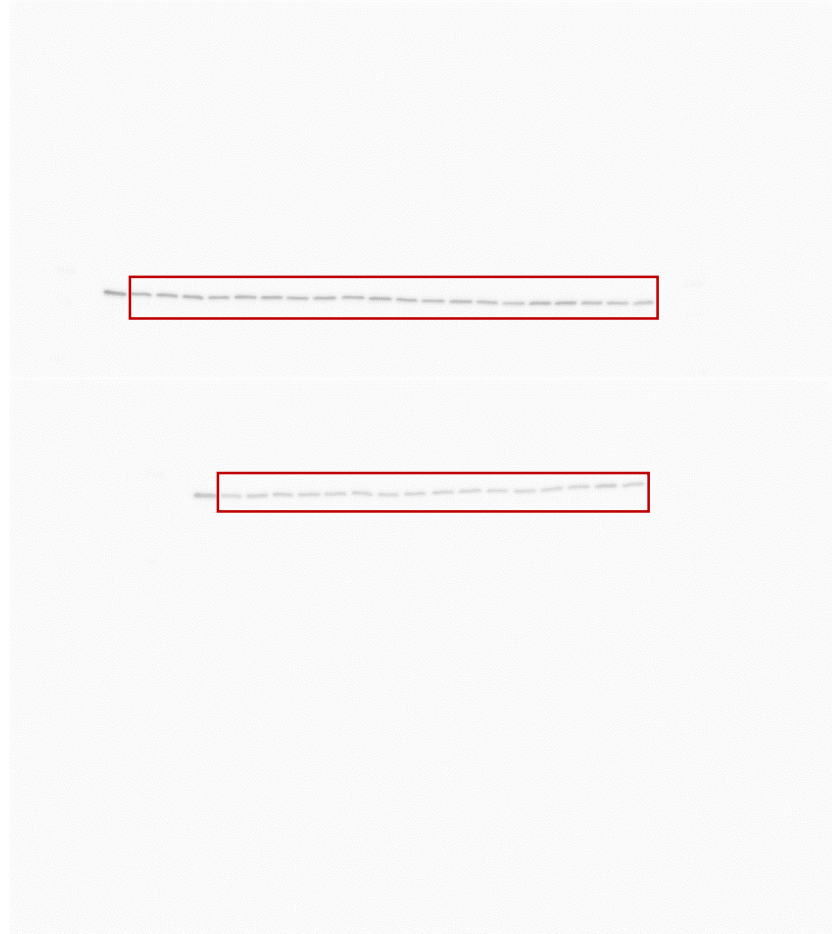



## OPA1

### Frontal cortex

membrane 1 and membrane 2

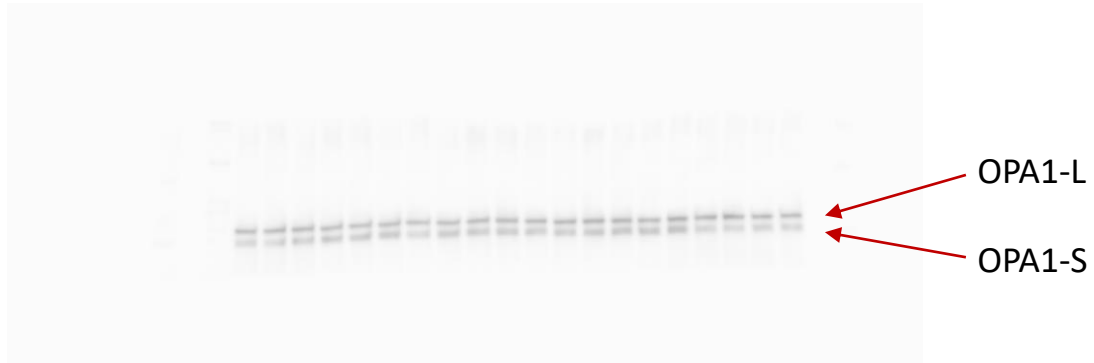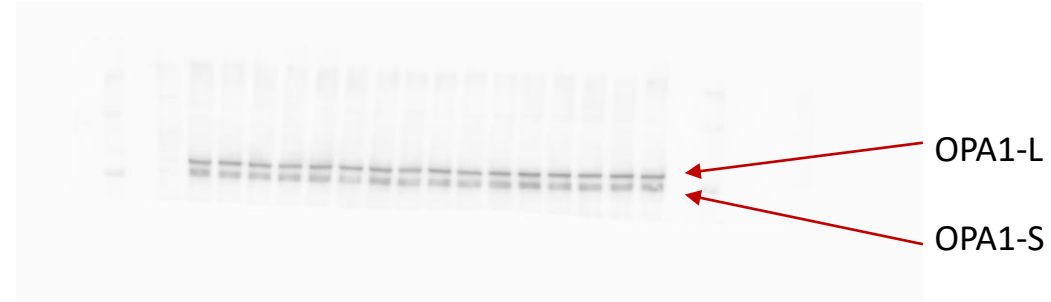

Samples from the left side - membrane 1:

*CTRL, CTRL + STRESS, DEX, DEX + STRESS, CTRL, CTRL + STRESS, DEX, DEX + STRESS, CTRL, CTRL + STRESS, DEX, DEX + STRESS, CTRL, CTRL + STRESS, DEX, DEX + STRESS.*

Samples from the left side - membrane 2:

*CTRL, CTRL + STRESS, DEX, DEX + STRESS, CTRL, CTRL + STRESS, DEX, DEX + STRESS, CTRL, CTRL + STRESS, DEX, DEX + STRESS, CTRL, CTRL + STRESS, DEX, DEX + STRESS.*

The results of the experiment are shown in Table 1.

## $\beta$ -actin as loading control to OPA1

### Frontal cortex

membrane 1 and membrane 2

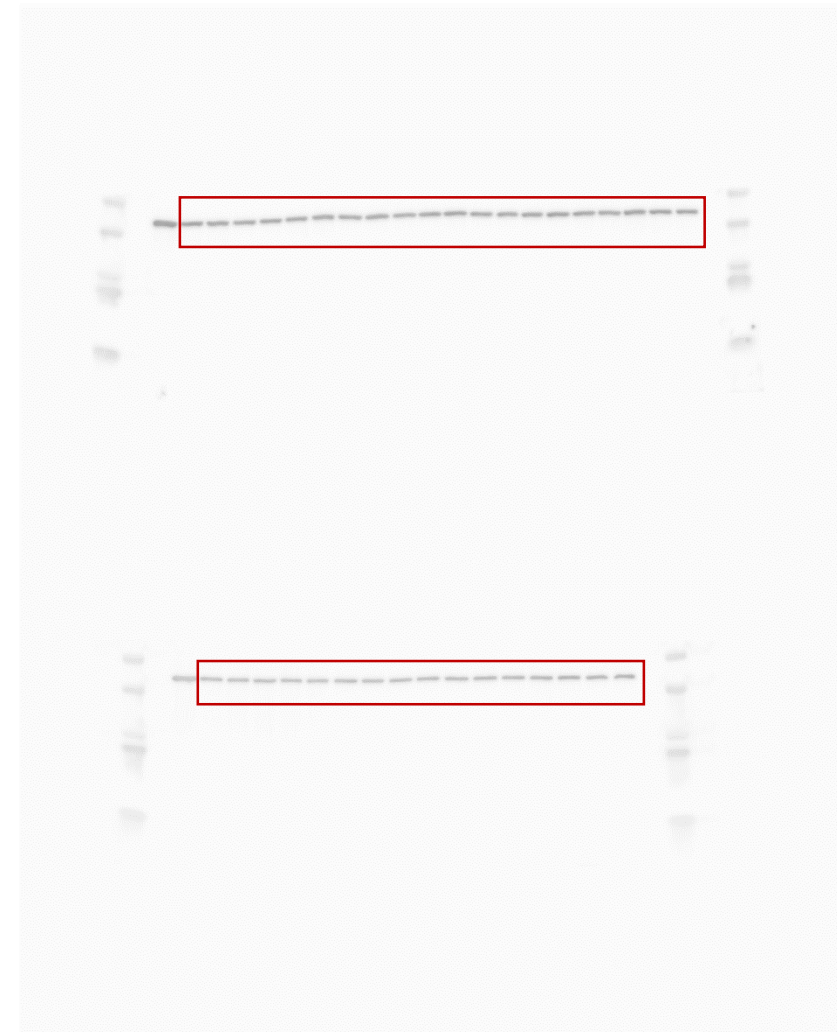

## OPA1

### Hippocampus

membrane 1 and membrane 2

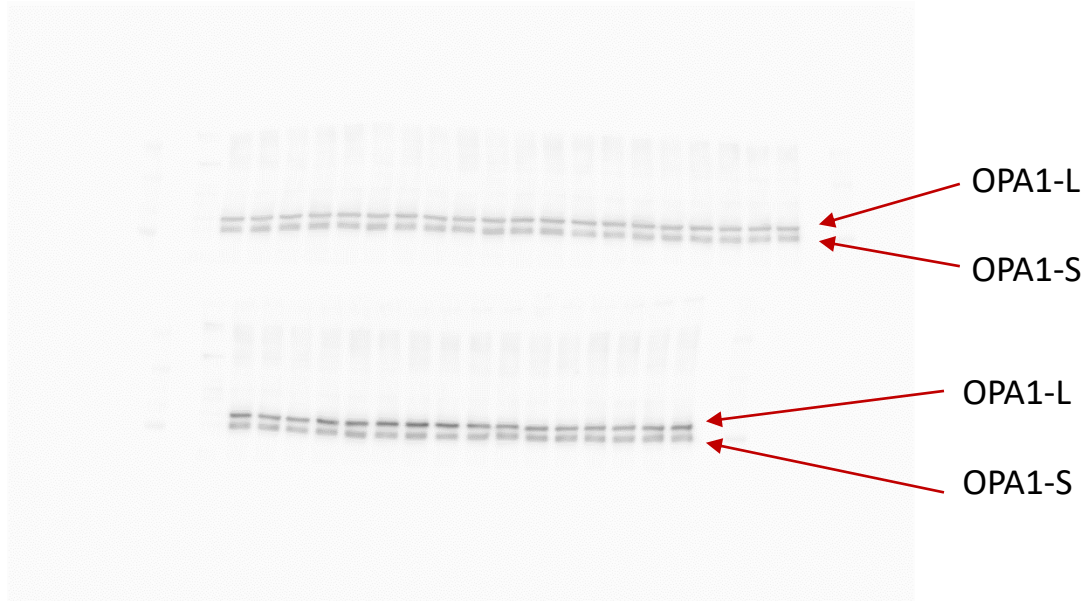

Samples from the left side - membrane 1:

*CTRL, CTRL + STRESS, DEX, DEX + STRESS, CTRL, CTRL + STRESS, DEX, DEX + STRESS, CTRL, CTRL + STRESS, DEX, DEX + STRESS, CTRL, CTRL + STRESS, DEX, DEX + STRESS.*

Samples from the left side - membrane 2:

*CTRL, CTRL + STRESS, DEX, DEX + STRESS, CTRL, CTRL + STRESS, DEX, DEX + STRESS, CTRL, CTRL + STRESS, DEX, DEX + STRESS, CTRL, CTRL + STRESS, DEX, DEX + STRESS.*

The results of the experiment are shown in Table 1.

## $\beta$ -actin as loading control to OPA1

### Hippocampus

membrane 1 and membrane 2

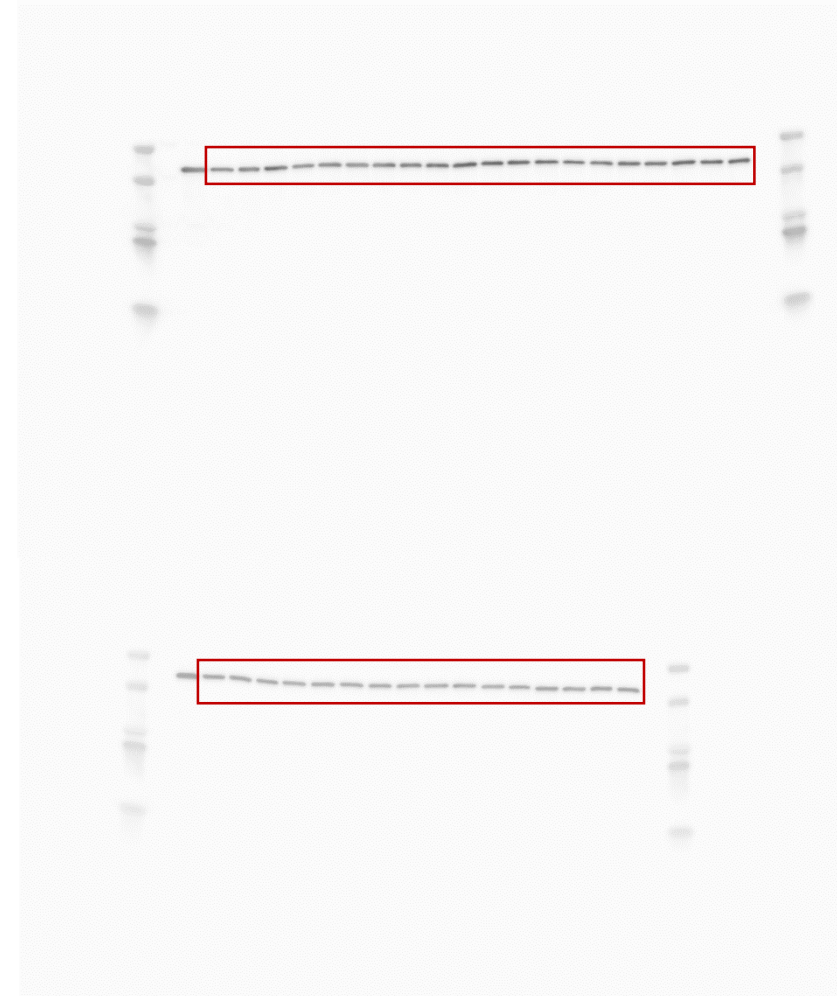

Supplement: s1 [file s1]
